# Supplementary material for: Assessment of Trends in Guideline-Based Oral Anticoagulant Prescription for Patients With Ischemic Stroke and Atrial Fibrillation in China
Source: PubMed Central journal article supplement (PMC8322995; doi:10.1001/jamanetworkopen.2021.18816), 2021-07-29
Supplement: jamanetwopen-e2118816-s001.pdf [file jamanetwopen-e2118816-s001.pdf]

## Supplementary Online Content

Gu HQ, Yang X, Wang CJ, et al. Assessment of trends in guideline-based oral anticoagulant prescription for patients with ischemic stroke and atrial fibrillation in China. *JAMA Netw Open.* 2021;4(7):e2118816. doi:10.1001/jamanetworkopen.2021.18816

**eFigure 1.** Flowchart of Study Population Identification

**eFigure 2.** Variation in OAC Prescription at Discharge

**eTable 1.** Baseline Characteristics by OAC Prescription at Discharge

**eTable 2.** Factors Associated With OAC Prescription at Discharge

This supplementary material has been provided by the authors to give readers additional information about their work.

**eFigure 1.** Flowchart of Study Population Identification

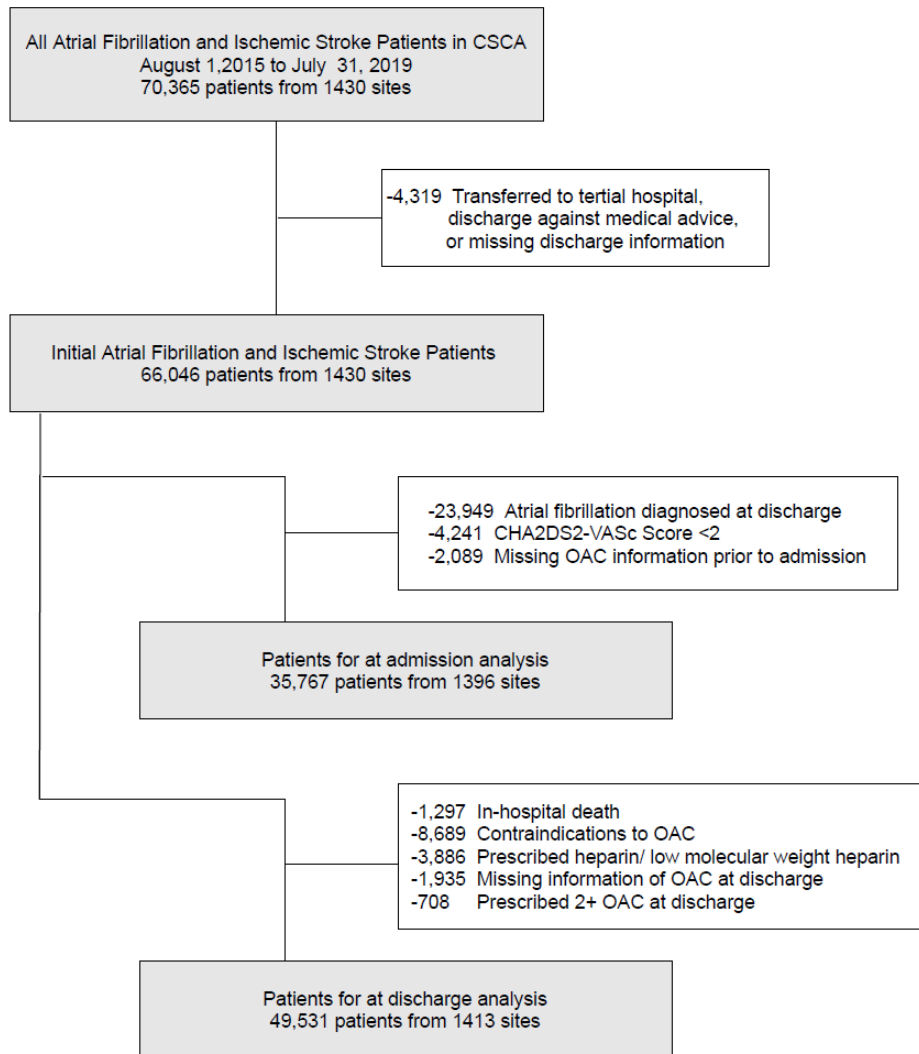

Abbreviations: CSCA, China Stroke Center Alliance; CHA<sub>2</sub>DS<sub>2</sub>-VASc, cardiac failure or dysfunction, hypertension, age 65-74 (1 point) or ≥75 years (2 points), diabetes mellitus, and stroke, transient ischemic attack or thromboembolism (2 points)—vascular disease, and sex category (female); OAC, oral anticoagulation.

**eFigure 2.** Variation in OAC Prescription at Discharge

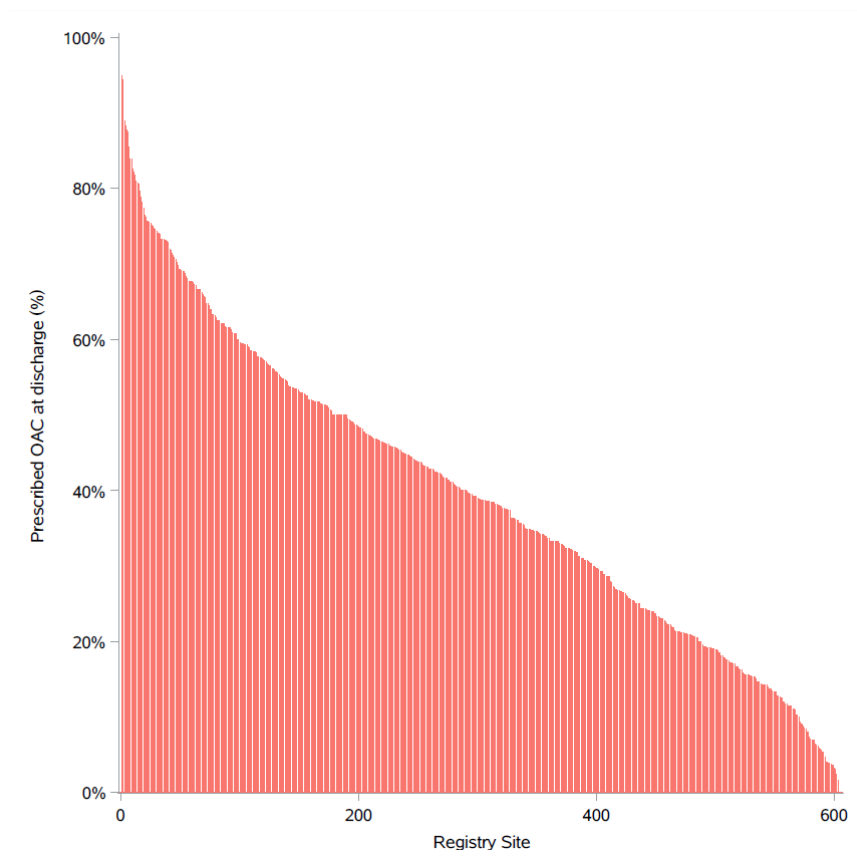

Abbreviations: OAC, oral anticoagulation.

**eTable 1.** Baseline Characteristics by OAC Prescription at Discharge

| Variables                                                 | Total<br>(N=49531) | On OAC<br>(N=20390) | Not on OAC<br>(N=29141) | ASD<br>(%) |
|-----------------------------------------------------------|--------------------|---------------------|-------------------------|------------|
| Age                                                       | 73.4±10.4          | 71.7±10.6           | 74.6±10.2               | 27.9       |
| Male                                                      | 26028 (52.5)       | 10749 (52.7)        | 15279 (52.4)            | 0.6        |
| Female                                                    | 23503 (47.5)       | 9641 (47.3)         | 13862 (47.6)            | 0.6        |
| Educational level                                         |                    |                     |                         |            |
| College                                                   | 1249 (2.5)         | 640 (3.1)           | 609 (2.1)               | 6.3        |
| High school                                               | 11889 (24.0)       | 5210 (25.6)         | 6679 (22.9)             | 6.3        |
| Below elementary school                                   | 18274 (36.9)       | 7122 (34.9)         | 11152 (38.3)            | 7.1        |
| Unclear                                                   | 18119 (36.6)       | 7418 (36.4)         | 10701 (36.7)            | 0.6        |
| Insurance                                                 |                    |                     |                         |            |
| UEBMI                                                     | 15464 (31.2)       | 6529 (32.0)         | 8935 (30.7)             | 2.8        |
| URBMI                                                     | 10529 (21.3)       | 4556 (22.3)         | 5973 (20.5)             | 4.4        |
| NRCMS                                                     | 18456 (37.3)       | 7013 (34.4)         | 11443 (39.3)            | 10.2       |
| Self-pay                                                  | 2862 (5.8)         | 1294 (6.3)          | 1568 (5.4)              | 3.8        |
| Other                                                     | 2220 (4.5)         | 998 (4.9)           | 1222 (4.2)              | 3.4        |
| Monthly income per capita,<br>¥ (US dollars) <sup>a</sup> |                    |                     |                         |            |
| ≤1000 (154)                                               | 3482 (7.0)         | 1220 (6.0)          | 2262 (7.8)              | 7.1        |
| 1001-5000 (155-771)                                       | 16716 (33.7)       | 6697 (32.8)         | 10019 (34.4)            | 3.4        |
| ≥5001 (772)                                               | 2760 (5.6)         | 1383 (6.8)          | 1377 (4.7)              | 9.0        |
| Unclear                                                   | 26573 (53.6)       | 11090 (54.4)        | 15483 (53.1)            | 2.6        |
| Current smoker or history of<br>smoking                   | 13620 (27.5)       | 5563 (27.3)         | 8057 (27.6)             | 0.7        |
| Drinking                                                  | 8730 (17.6)        | 3609 (17.7)         | 5121 (17.6)             | 0.3        |
| Risk factors known before<br>admission                    |                    |                     |                         |            |
| Prior Stroke or TIA                                       | 17279 (34.9)       | 6598 (32.4)         | 10681 (36.7)            | 9.1        |
| CHD or MI                                                 | 10550 (21.3)       | 4425 (21.7)         | 6125 (21.0)             | 1.7        |
| Hypertension                                              | 30552 (61.7)       | 11919 (58.5)        | 18633 (63.9)            | 11.1       |
| Diabetes                                                  | 8475 (17.1)        | 3333 (16.3)         | 5142 (17.6)             | 3.5        |
| Dyslipidemia                                              | 3419 (6.9)         | 1322 (6.5)          | 2097 (7.2)              | 2.8        |
| Heart failure                                             | 2715 (5.5)         | 1071 (5.3)          | 1644 (5.6)              | 1.3        |
| Carotid stenosis                                          | 656 (1.3)          | 238 (1.2)           | 418 (1.4)               | 1.8        |
| PVD                                                       | 1387 (2.8)         | 506 (2.5)           | 881 (3.0)               | 3.1        |
| Atrial fibrillation                                       | 31232 (63.1)       | 13305 (65.3)        | 17927 (61.5)            | 7.9        |
| Medication before admission                               |                    |                     |                         |            |
| Antiplatelet medication                                   | 12679 (25.6)       | 4616 (22.6)         | 8063 (27.7)             | 11.8       |

|                                                      |               |               |               |      |
|------------------------------------------------------|---------------|---------------|---------------|------|
| Anticoagulants                                       | 6046 (12.2)   | 4483 (22.0)   | 1563 (5.4)    | 49.7 |
| Antihypertension medication                          | 23314 (47.1)  | 9307 (45.6)   | 14007 (48.1)  | 5.0  |
| Glucose-lowering medication                          | 6581 (13.3)   | 2630 (12.9)   | 3951 (13.6)   | 2.1  |
| Lipid-lowering medication                            | 8987 (18.1)   | 3806 (18.7)   | 5181 (17.8)   | 2.3  |
| CHA <sub>2</sub> DS <sub>2</sub> -VASc, median (IQR) | 3.0 (2.0–5.0) | 3.0 (2.0–4.0) | 3.0 (2.0–5.0) |      |
| Hospital level                                       |               |               |               |      |
| Secondary                                            | 14911 (30.1)  | 5017 (24.6)   | 9894 (34.0)   | 20.8 |
| Tertiary                                             | 34620 (69.9)  | 15373 (75.4)  | 19247 (66.0)  | 20.8 |
| Region                                               |               |               |               |      |
| Eastern                                              | 26270 (53.0)  | 11160 (54.7)  | 15110 (51.9)  | 5.6  |
| Central                                              | 11918 (24.1)  | 4266 (20.9)   | 7652 (26.3)   | 12.7 |
| Western                                              | 11343 (22.9)  | 4964 (24.3)   | 6379 (21.9)   | 5.7  |

Abbreviations: AF, atrial fibrillation; ASD, absolute standardized difference; CHD, coronary heart disease; IQR, interquartile range; MI, myocardial infarction; NRCMS, new rural cooperative medical scheme; OAC, oral anticoagulation; PVD, peripheral vascular disease; TIA, transient ischemic attack; UEBMI, urban employee basic medical insurance; URBMI, urban resident basic medical insurance.

<sup>a</sup>Conversion rate, \$1 = ¥6.41.

**eTable 2.** Factors Associated With OAC Prescription at Discharge

| Factor                                                 | Unadjusted Analysis |         | Adjusted Analysis |         |
|--------------------------------------------------------|---------------------|---------|-------------------|---------|
|                                                        | OR (95% CI)         | P Value | OR (95% CI)       | P Value |
| Age per 5 y                                            | 0.88 (0.87–0.88)    | <.0001  | 0.89 (0.89–0.90)  | <.0001  |
| Female                                                 | 0.99 (0.95–1.02)    | 0.5308  | 1.02 (0.98–1.07)  | 0.3042  |
| Educational level                                      |                     |         |                   |         |
| College                                                | 1.0 (Reference)     |         | 1.0 (Reference)   |         |
| Below elementary school                                | 0.61 (0.54–0.68)    | <.0001  | 0.84 (0.74–0.95)  | 0.0058  |
| High school                                            | 0.74 (0.66–0.83)    | <.0001  | 0.86 (0.76–0.97)  | 0.0186  |
| Unclear                                                | 0.66 (0.59–0.74)    | <.0001  | 0.81 (0.71–0.92)  | 0.0011  |
| Insurance                                              |                     |         |                   |         |
| UEBMI                                                  | 1.0 (Reference)     |         | 1.0 (Reference)   |         |
| URBMI                                                  | 1.04 (0.99–1.10)    | 0.0928  | 1.07 (1.01–1.13)  | 0.0201  |
| NRCMS                                                  | 0.84 (0.80–0.88)    | <.0001  | 0.92 (0.87–0.96)  | 0.0008  |
| Self-pay                                               | 1.13 (1.04–1.22)    | 0.0030  | 0.95 (0.87–1.04)  | 0.2575  |
| Other                                                  | 1.12 (1.02–1.22)    | 0.0149  | 1.04 (0.95–1.15)  | 0.3893  |
| Monthly income per capita, ¥ (US dollars) <sup>a</sup> |                     |         |                   |         |
| ≤1000 (154 )                                           | 0.54 (0.48–0.59)    | <.0001  | 0.66 (0.59–0.73)  | <.0001  |
| 1001-5000 (155-771)                                    | 0.67 (0.61–0.72)    | <.0001  | 0.71 (0.65–0.77)  | <.0001  |
| ≥5001 (772)                                            | 1.0 (Reference)     |         | 1.0 (Reference)   |         |
| Unclear                                                | 0.71 (0.66–0.77)    | <.0001  | 0.77 (0.71–0.84)  | <.0001  |
| Current smoker or history of smoking                   | 0.98 (0.94–1.02)    | 0.3701  | 0.97 (0.92–1.02)  | 0.2056  |
| Drinking                                               | 1.01 (0.96–1.06)    | 0.7158  | 0.96 (0.90–1.02)  | 0.1585  |
| Risk factors known before admission                    |                     |         |                   |         |
| Prior Stroke or TIA                                    | 0.83 (0.80–0.86)    | <.0001  | 0.78 (0.75–0.82)  | <.0001  |
| CHD or MI                                              | 1.04 (1.00–1.09)    | 0.0676  | 0.98 (0.93–1.03)  | 0.4032  |
| Hypertension                                           | 0.79 (0.76–0.82)    | <.0001  | 0.84 (0.80–0.89)  | <.0001  |
| Diabetes mellitus                                      | 0.91 (0.87–0.96)    | 0.0002  | 0.91 (0.83–0.99)  | 0.0310  |
| Dyslipidemia                                           | 0.89 (0.83–0.96)    | 0.0021  | 0.87 (0.80–0.94)  | 0.0006  |
| Heart Failure                                          | 0.93 (0.86–1.00)    | 0.0613  | 0.96 (0.88–1.05)  | 0.4013  |
| Carotid stenosis                                       | 0.81 (0.69–0.95)    | 0.0106  | 0.83 (0.69–0.98)  | 0.0328  |
| PVD                                                    | 0.82 (0.73–0.91)    | 0.0003  | 0.80 (0.71–0.90)  | 0.0003  |
| Atrial fibrillation                                    | 1.17 (1.13–1.22)    | <.0001  | 1.08 (1.04–1.13)  | 0.0001  |
| Medication before admission                            |                     |         |                   |         |
| Antiplatelet medication                                | 0.76 (0.73–0.80)    | <.0001  | 0.70 (0.66–0.74)  | <.0001  |
| Antihypertension                                       | 0.91 (0.88–0.94)    | <.0001  | 1.08 (1.02–1.14)  | 0.0061  |

|                             |                  |        |                  |        |
|-----------------------------|------------------|--------|------------------|--------|
| medication                  |                  |        |                  |        |
| Glucose-lowering medication | 0.94 (0.90–1.00) | 0.0333 | 0.99 (0.90–1.09) | 0.8427 |
| Lipid-lowering medication   | 1.06 (1.01–1.11) | 0.0117 | 1.10 (1.03–1.17) | 0.0042 |
| Anticoagulation             | 4.97 (4.68–5.28) | <.0001 | 5.17 (4.84–5.52) | <.0001 |
| Hospital level              |                  |        |                  |        |
| Secondary                   | 0.63 (0.61–0.66) | <.0001 | 0.71 (0.68–0.74) | <.0001 |
| Tertiary                    | 1.0 (Reference)  |        | 1.0 (Reference)  |        |
| Region                      |                  |        |                  |        |
| Central                     | 0.72 (0.68–0.76) | <.0001 | 0.80 (0.75–0.84) | <.0001 |
| Eastern                     | 0.95 (0.91–0.99) | 0.0213 | 1.02 (0.97–1.07) | 0.5183 |
| Western                     | 1.0 (Reference)  |        | 1.0 (Reference)  |        |

Abbreviations: AF, atrial fibrillation; ASD, absolute standardized difference; CHD, coronary heart disease; CI, confidence interval; IQR, interquartile range; MI, myocardial infarction; NRCMS, new rural cooperative medical scheme; OR, odds ratio; PVD, peripheral vascular disease; TIA, transient ischemic attack; UEBMI, urban employee basic medical insurance; URBMI, urban resident basic medical insurance.

<sup>a</sup>Conversion rate, \$1 = ¥6.41.
